# Supplementary material
Source: PubMed Central journal article supplement (PMC4818195)
Supplement: NIHMS714164-supplement-supplement_1.pdf [file NIHMS714164-supplement-supplement_1.pdf]

**Supplemental Table 1 – Clinic and Lab Follow-Up Schedule for Stable Kidney Transplant Recipients**

| <b>Post-Transplant Time Period</b> | <b>Laboratory Frequency</b> | <b>Clinic Visit Frequency</b> | <b>Routine Lab Testing<sup>1</sup></b>             |
|------------------------------------|-----------------------------|-------------------------------|----------------------------------------------------|
| 0 – 2 weeks                        | Daily or every other day    | Twice weekly                  | BMP, CBC, Mg, PO4, Tacrolimus, UA <sup>2,3,4</sup> |
| 2 – 4 weeks                        | Twice a week                | Once weekly                   |                                                    |
| 4 – 8 weeks                        | Once weekly                 | Every 2 weeks                 |                                                    |
| 8 – 12 weeks                       | Every 2 weeks               | Every 4 weeks                 |                                                    |
| 3 – 6 months                       | Once Monthly                | Every 6 weeks                 |                                                    |
| 6 – 12 months                      | Once Monthly                | Every 3 months                |                                                    |
| 1 – 2 years                        | Every 2-3 Months            | Every 6 months                |                                                    |
| >2 years                           | Every 4-6 Months            | Once yearly                   |                                                    |

Footnotes:

1. Protocol biopsies in all patients at 3 months, 1 year and 2 years post-transplant
2. BK PCR schedule: 1, 2, 3, 6, 9, 12, 18 and 24 months post-transplant
3. CMV PCR schedule: Depends on donor/recipient status, antiviral prophylaxis and induction therapy choice
4. Additional labs: other immunosuppressant levels when indicated (cyclosporine, sirolimus, everolimus), hemoglobin A1C every 3-6 months, fasting lipid panel every 6-12 months, spot urine protein/creatinine ratio with all labs for at risk patients, liver function tests yearly, PTH and vitamin D levels in at risk patients
